# Supplementary material
Source: PubMed Central journal article supplement (PMC3133935)
Supplement: NIHMS298990-supplement-1_si_001.pdf [file NIHMS298990-supplement-1_si_001.pdf]

## **Supporting Information**

### **An Efficient Bifunctional Decadentate Ligand 3p-C-DEPA for Targeted Alpha Radioimmunotherapy Applications**

Hyun A Song,<sup>1</sup> Chi Soo Kang,<sup>1</sup> Kwamena E. Baidoo,<sup>2</sup> Diane E. Milenic,<sup>2</sup> Yunwei Chen<sup>1</sup>, Anzhi Dai,<sup>1</sup> M. W. Brechbiel,<sup>2</sup> and Hyun-Soon Chong<sup>1,\*</sup>

1. Radiolabeling reaction kinetics of C-DOTA-trastuzumab conjugate (SE-HPLC).
2. Radiolabeling reaction kinetics of 3p-C-DEPA-trastuzumab conjugate (SE-HPLC).
3. Serum stability of <sup>205/6</sup>Bi-3p-C-DEPA-trastuzumab conjugate (SE-HPLC)
4. Biodistribution data for <sup>205/6</sup>Bi-C-DOTA and <sup>205/6</sup>Bi-3p-C-DEPA in athymic mice bearing s.c. LS-174T tumors (Table 1).

# 1. Radiolabeling reaction kinetics of C-DOTA-Trastuzumab conjugate with $^{205/6}\text{Bi}$ (SE-HPLC).

## Sample 1

1 min (6.9%)

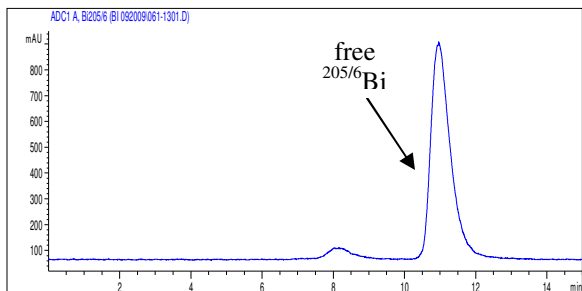

5 min (16.7%)

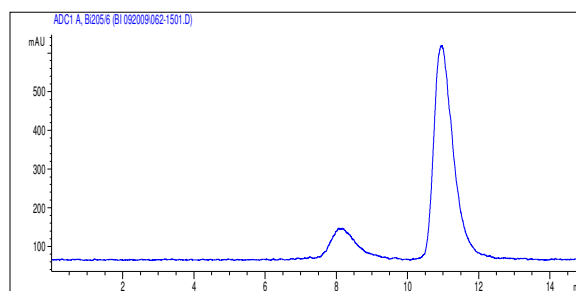

10 min (25.5%)

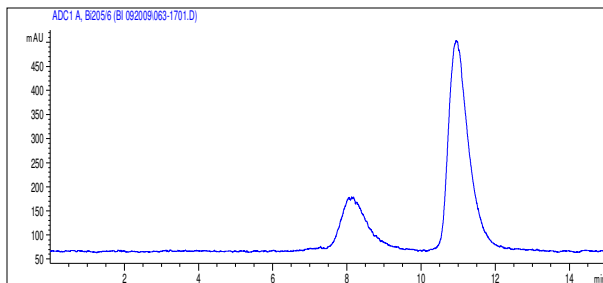

20 min (34.7%)

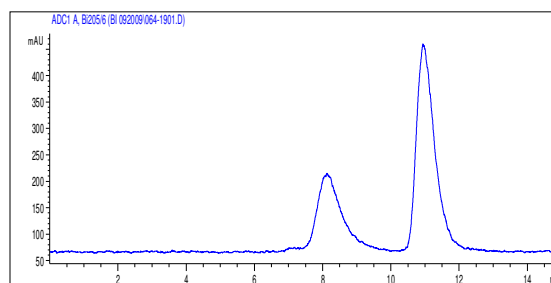

30 min (49.5%)

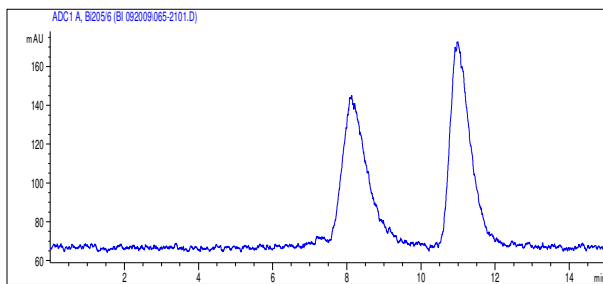

60 min (56.9%)

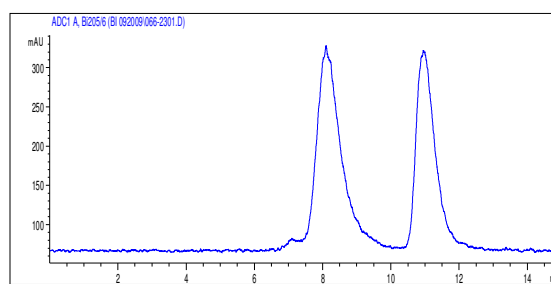

## **Sample 2**

**1 min (7.9%)**

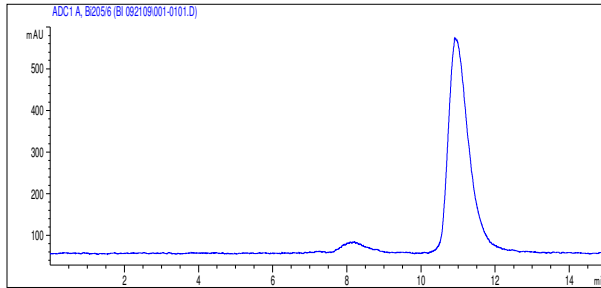

**5 min (13.2%)**

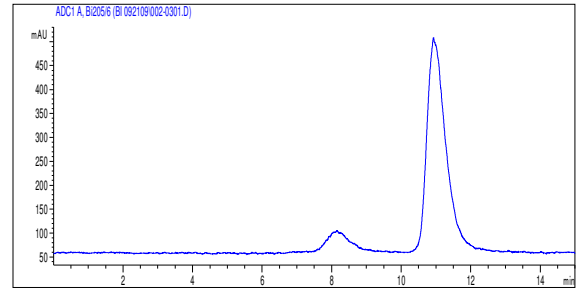

**10 min (26.7%)**

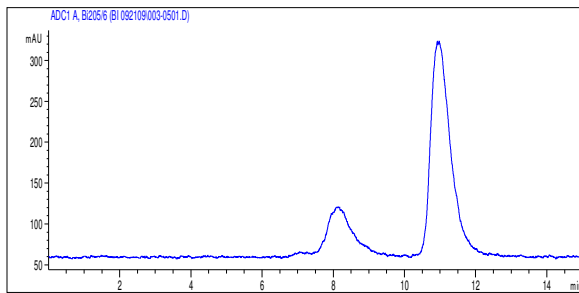

**20 min (35.7%)**

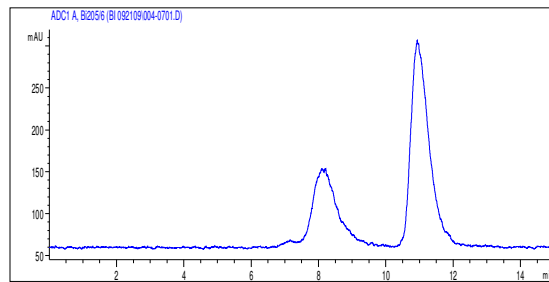

**30 min (40.9%)**

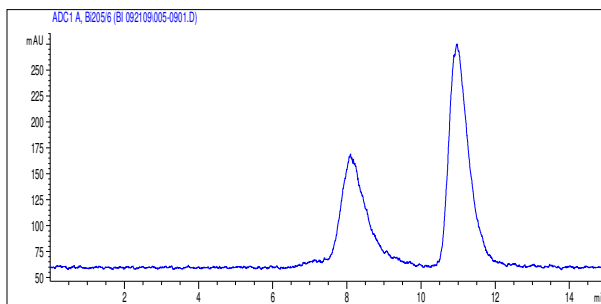

**60 min (54.4%)**

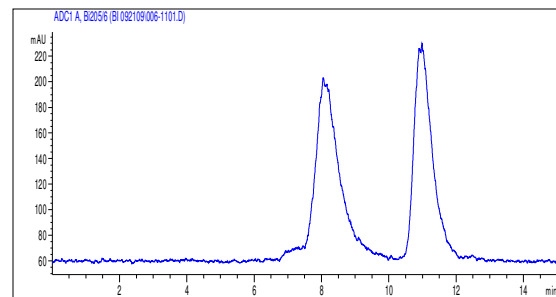

### Sample 3

**1 min (10.5%)**

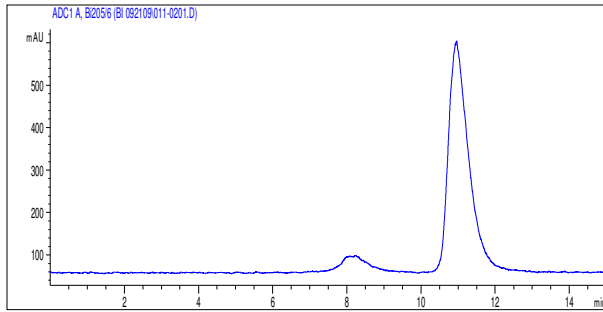

**5 min (21.8%)**

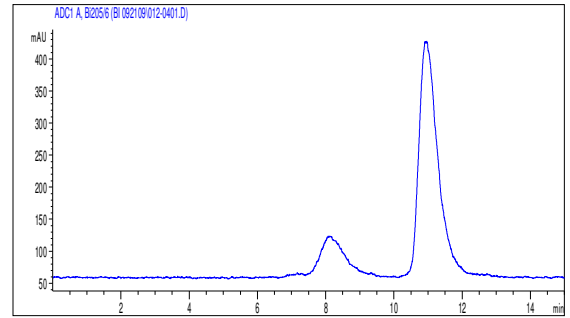

**10 min (33.9%)**

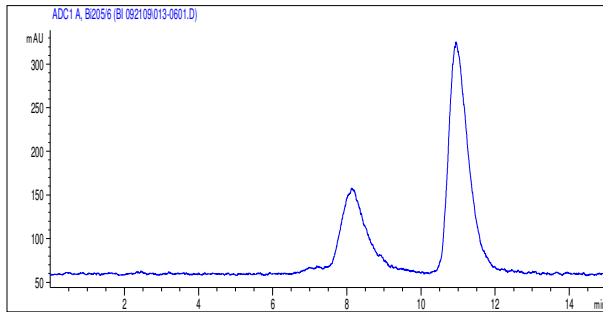

**20 min (43.6%)**

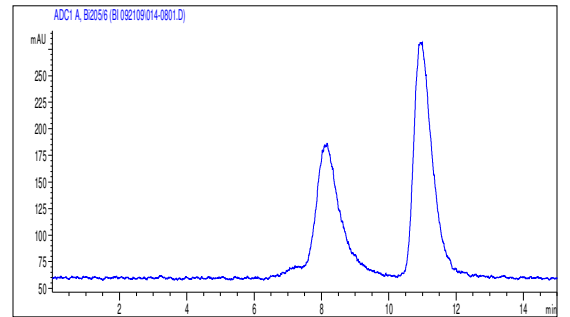

**30 min (58.8%)**

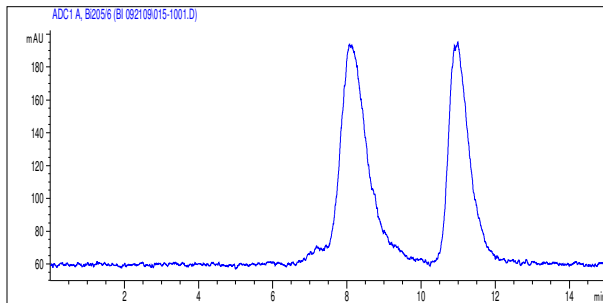

**60 min (69.4%)**

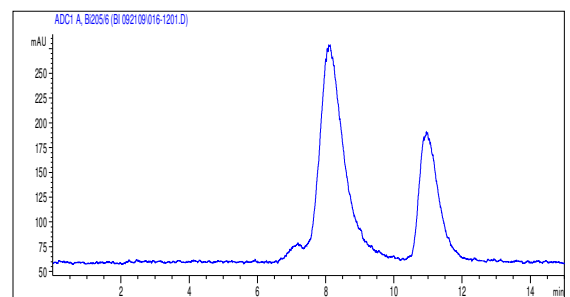

## 2. Radiolabeling reaction kinetics of 3p-C-DEPA-Trastuzumab conjugate with $^{205/6}\text{Bi}$ (SE-HPLC).

### Smample 1

**1 min (94.0%)**

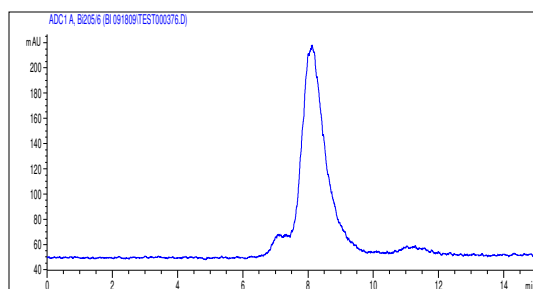

**5 min (95.6%)**

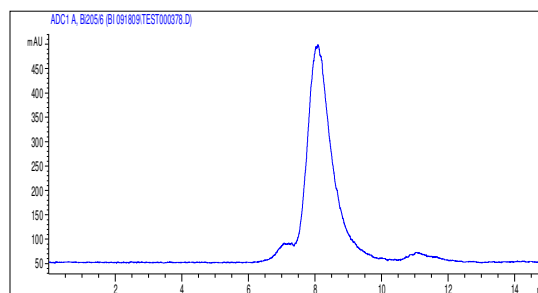

**10 min (95.2%)**

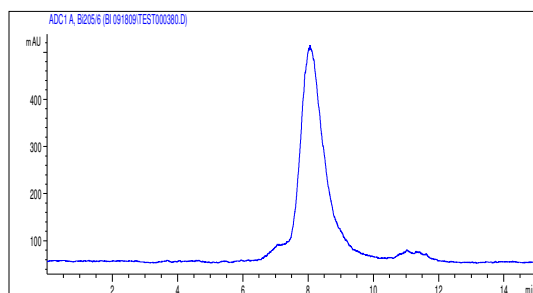

**20 min (94.8%)**

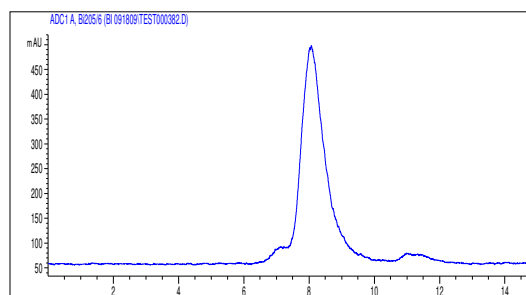

**30 min (95.9%)**

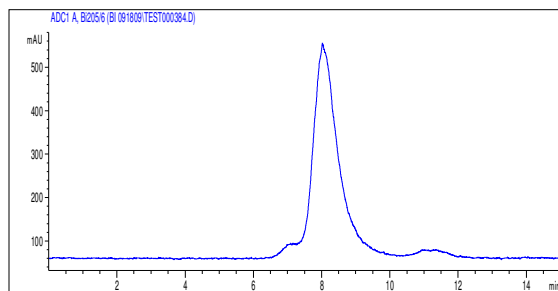

**60 min (94.9%)**

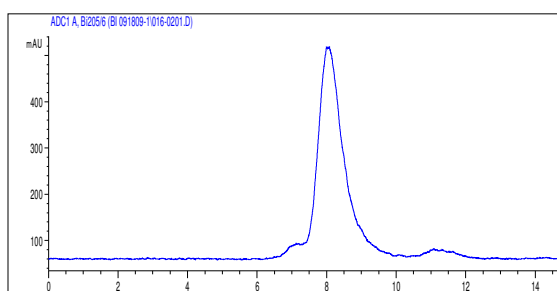

## Sample 2

**1 min (93.6%)**

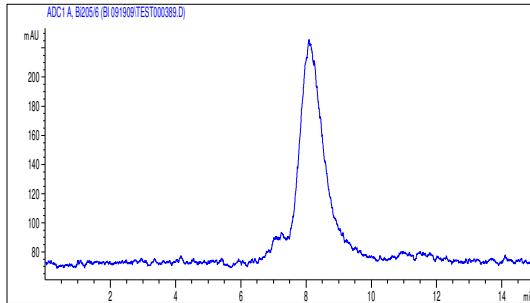

**5 min (94.8%)**

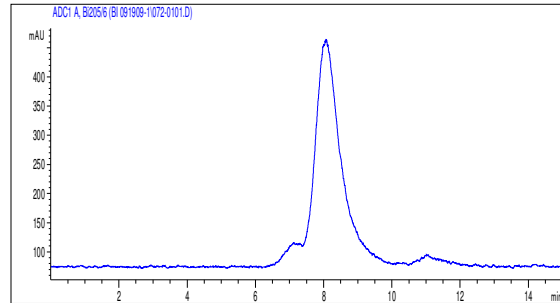

**10 min (95.2%)**

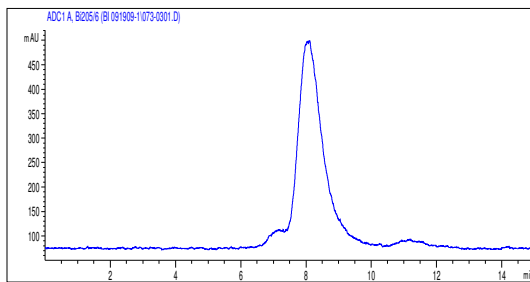

**20 min (93.8%)**

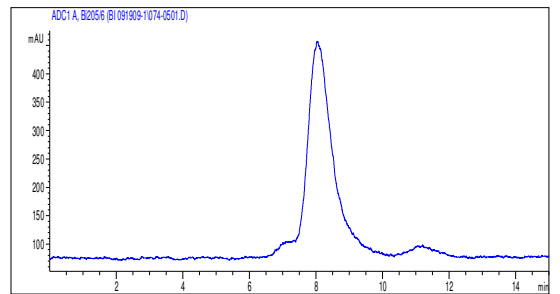

**30 min (92.8%)**

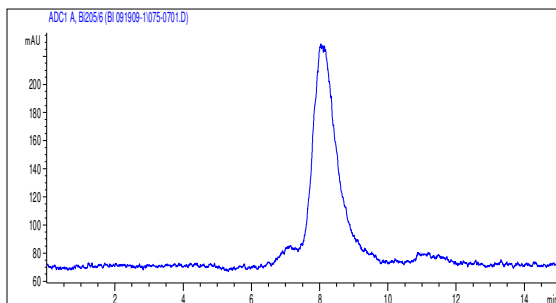

**60 min (94.0%)**

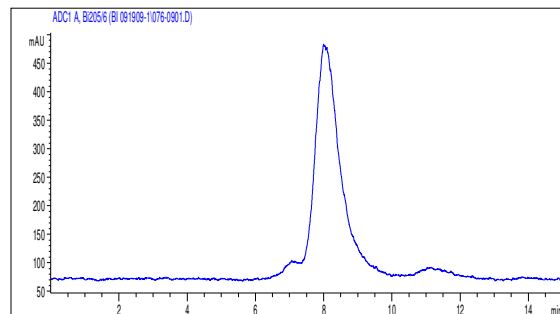

### Sample 3

**1 min (93.2%)**

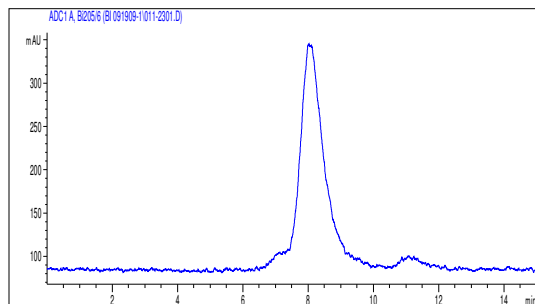

**5 min (93.8%)**

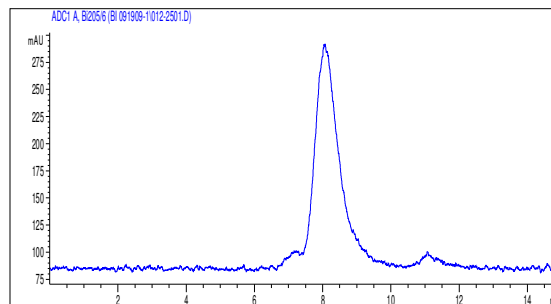

**10 min (94.5%)**

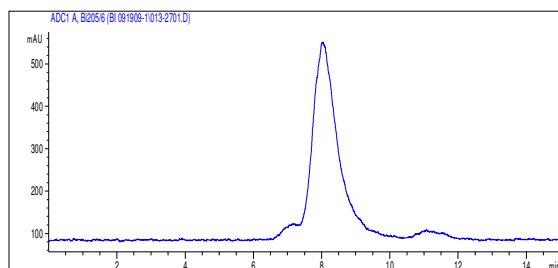

**20 min (93.8%)**

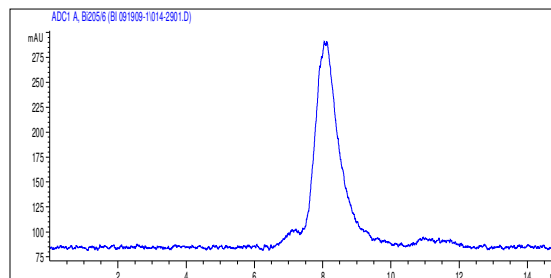

**30 min (94.5%)**

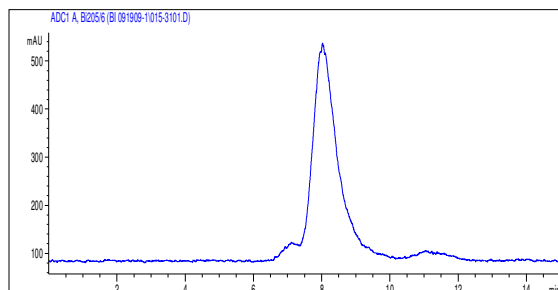

**60 min (94.7%)**

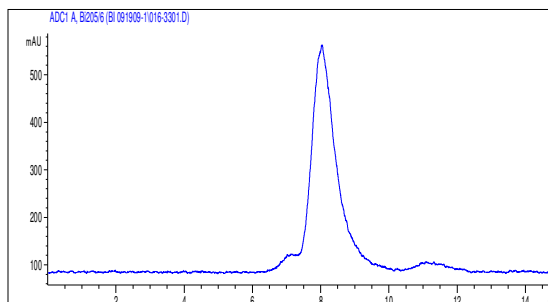

### 3. Serum stability of $^{205/16}\text{Bi}$ -3p-C-DEPA-Trastuzumab conjugate (Size Exclusion-HPLC)

0 h (100%)

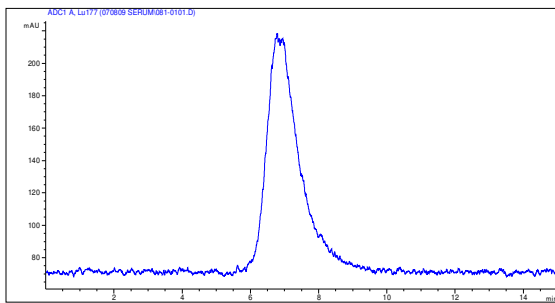

Day 1 (100%)

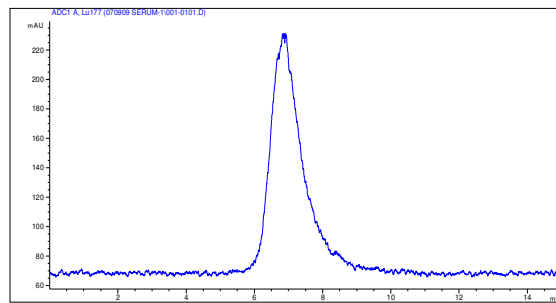

Day 2 (100%)

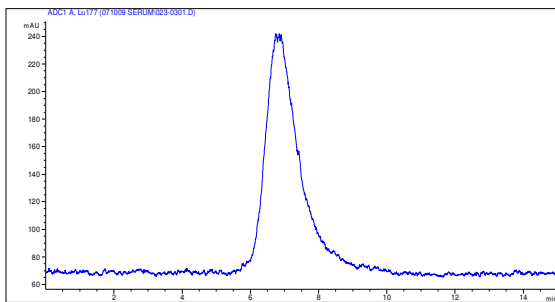

Day 3 (100%)

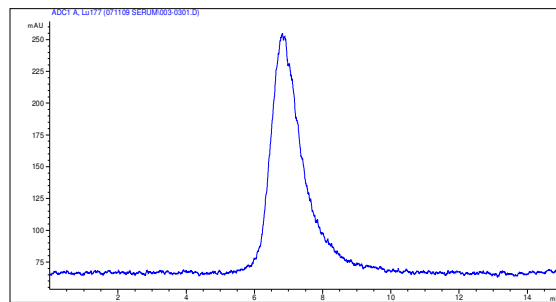

Day 4 (100%)

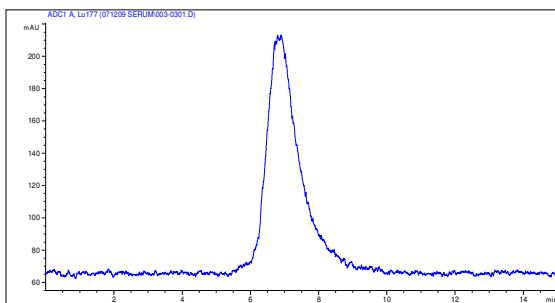



**Table 1. Biodistribution of  $^{205/6}\text{Bi-3p-C-DEPA-Trastuzumab}$  conjugate and  $^{205/6}\text{Bi-C-DOTA-Trastuzumab}$  conjugate in athymic mice bearing s.c. LS-174T tumors.**

| Ligand           | Tissue | Time points (h) |        |       |        |      |        |
|------------------|--------|-----------------|--------|-------|--------|------|--------|
|                  |        | 2h              |        | 6h    |        | 24h  |        |
| <b>3p-C-DEPA</b> | Blood  | 18.77           | ± 2.44 | 18.65 | ± 1.78 | 12.1 | ± 2.97 |
|                  | Tumor  | 9.63            | ± 2.72 | 16.24 | ± 6.41 | 27.3 | ± 9.79 |
|                  | Liver  | 6.64            | ± 2.24 | 9.70  | ± 1.23 | 7.73 | ± 0.56 |
|                  | Spleen | 5.19            | ± 1.2  | 6.96  | ± 1.19 | 6.75 | ± 2.08 |
|                  | Kidney | 6.60            | ± 0.78 | 7.77  | ± 0.74 | 6.27 | ± 1.31 |
|                  | Lung   | 4.92            | ± 3.01 | 8.05  | ± 1.14 | 6.43 | ± 1.69 |
|                  | Heart  | 4.88            | ± 0.85 | 6.26  | ± 0.6  | 4.35 | ± 0.96 |
|                  | Femur  | 3.21            | ± 0.43 | 3.07  | ± 0.16 | 2.78 | ± 0.40 |
| <b>C-DOTA</b>    | Blood  | 18.38           | ± 1.82 | 15.94 | ± 3.05 | 12.2 | ± 2.12 |
|                  | Tumor  | 10.21           | ± 2.25 | 11.27 | ± 2.49 | 25.8 | ± 9.29 |
|                  | Liver  | 4.84            | ± 0.81 | 7.19  | ± 1.51 | 8.02 | ± 1.23 |
|                  | Spleen | 4.09            | ± 0.31 | 4.26  | ± 0.96 | 4.70 | ± 1.57 |
|                  | Kidney | 5.17            | ± 0.44 | 5.26  | ± 0.88 | 5.52 | ± 0.89 |
|                  | Lung   | 7.83            | ± 1.07 | 6.64  | ± 1.05 | 6.08 | ± 0.57 |
|                  | Heart  | 5.34            | ± 0.29 | 4.94  | ± 0.23 | 4.12 | ± 0.92 |
|                  | Femur  | 2.56            | ± 0.45 | 2.00  | ± 0.35 | 2.49 | ± 0.14 |
